# Supplementary material for: Similar uptake but different trafficking and escape routes of reovirus virions and infectious subvirion particles imaged in polarized Madin–Darby canine kidney cells
Source: PubMed Central journal article supplement — Mol Biol Cell. 2013 Apr 15;24(8):1196–207. doi: 10.1091/mbc.E12-12-0852 (PMC3623640; doi:10.1091/mbc.e12-12-0852), 2013-04-15
Supplement: supp_E12-12-0852_CombinedSupMats.pdf [file supp_E12-12-0852_CombinedSupMats.pdf]

## Supplementary Information

**Movie 1** Dynamics of MRV virion uptake in nonpolarized MDCK cells. Cells expressing AP2-GFP (green) were seeded 1 day before transfection with a plasmid encoding CLCa-TOM (red). After one additional day, Alexa647-labeled virions (blue) were added to the cells, and the 2D time series from a single optical was acquired for 300 s at 2-s intervals using 100 ms exposures by live-cell spinning-disk confocal microscopy. Numerous examples of clathrin/AP2-associated uptake events for single virions are visualized.

**Movie 2** Dynamics of MRV virion uptake at the apical surface of polarized MDCK cells. Cells expressing AP2-GFP (green) were seeded 3-5 days before the experiment to allow polarization. Alexa647-labeled virions (red) were added to the cells, and the 2D time series was acquired for 160 s at 2-s intervals using 100 ms exposures by live-cell spinning-disk confocal microscopy. The complete AP2-associated uptake event for a single virion is visualized, from virion attachment and capture in a coated pit to directional movement after coated-vesicle budding and uncoating.

**Movie 3** Dynamics of MRV virion uptake at the apical surface of polarized MDCK cells. Cells expressing AP2-GFP (green) were seeded 3-5 days before the experiment to allow polarization. Alexa647-labeled virions (red) were added to the cells, and the 3D time series was acquired for 240 s at 2-s intervals using 100 ms exposures by live-cell 4D spinning-disk confocal microscopy. Each frame in the movie is the maximum-intensity Z-projection from three serial optical sections spaced 0.5  $\mu\text{m}$  apart. Several examples of AP2-associated uptake events for single virions are visualized.

**Movie 4** Dynamics of MRV ISVP uptake at the apical surface of polarized MDCK cells. Cells expressing AP2-GFP (green) were seeded 3-5 days before the experiment to allow polarization. Alexa647-labeled ISVPs (red) were added to the cells, and the 3D time series was acquired for 200 s at 2-s intervals using 100 ms exposures by live-cell 4D spinning-disk confocal microscopy. Each frame in the movie is the maximum-intensity Z-projection from four serial optical sections spaced 0.5  $\mu\text{m}$  apart. Several examples of AP2-associated uptake events for single ISVPs are visualized.

**Movie 5** Dynamics of MRV  $\mu 1(N42A)$ -ISVPs uptake at the apical surface of polarized MDCK cells. Cells expressing AP2-GFP (green) were seeded 3-5 days before the experiment to allow polarization. Alexa647-labeled  $\mu 1(N42A)$ -ISVPs (red) were added to the cells, and the 3D time series was acquired for 200 s at 2-s intervals using 100 ms exposures by live-cell 4D spinning-disk confocal microscopy. Each frame in the movie is the maximum-intensity Z-projection from four serial optical sections spaced 0.5  $\mu\text{m}$  apart. Several examples of AP2-associated uptake events for single ISVPs are visualized.
